# Supplementary material for: Axonal transport of late endosomes and amphisomes is selectively modulated by local Ca2+ efflux and disrupted by PSEN1 loss of function
Source: PubMed Central journal article supplement — Sci Adv. 2022 Apr 29;8(17):eabj5716. doi: 10.1126/sciadv.abj5716 (PMC9054012; doi:10.1126/sciadv.abj5716), 2022-04-29
Supplement: sciadv.abj5716_sm.pdf [file sciadv.abj5716_sm.pdf]

Supplementary Materials for

**Axonal transport of late endosomes and amphisomes is selectively modulated  
by local Ca<sup>2+</sup> efflux and disrupted by PSEN1 loss of function**

Pearl P. Y. Lie, Lang Yoo, Chris N. Goulbourne, Martin J. Berg, Philip Stavrides,  
Chunfeng Huo, Ju-Hyun Lee, Ralph A. Nixon\*

\*Corresponding author. Email: [nixon@nki.rfmh.org](mailto:nixon@nki.rfmh.org)

Published 29 April 2022, *Sci. Adv.* **8**, eabj5716 (2022)  
DOI: [10.1126/sciadv.abj5716](https://doi.org/10.1126/sciadv.abj5716)

**The PDF file includes:**

Figs. S1 to S7  
Table S1  
Legend for data S1

**Other Supplementary Material for this manuscript includes the following:**

Data S1

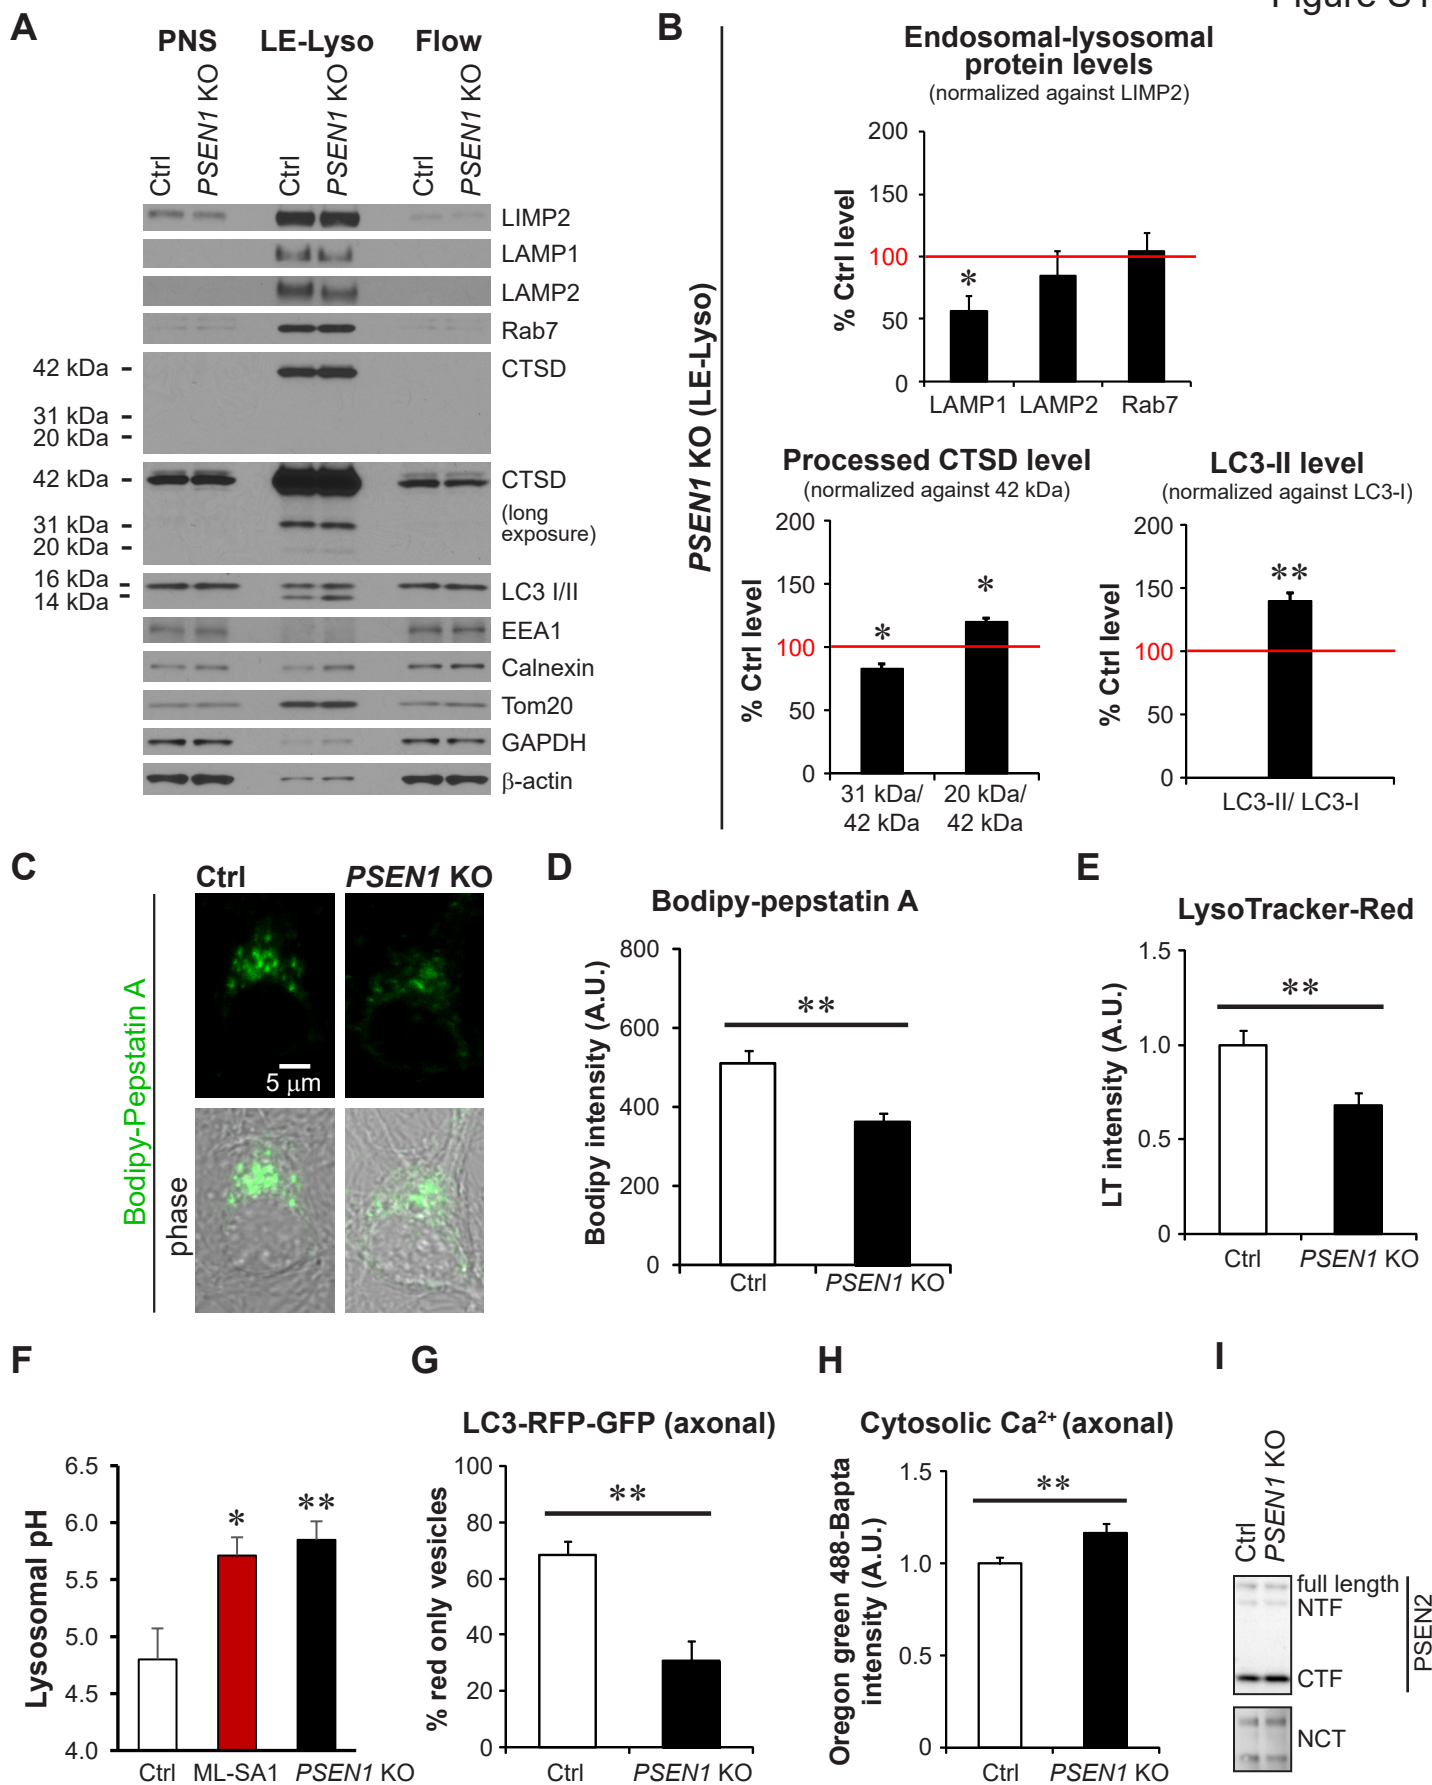

**Fig. S1. Lysosomal deficits and calcium dysregulation in *PSENI* KO neurons (related to Fig. 1).**

**(A-B)** Fractionation of the post-nuclear supernatant (PNS) resulted in the “LE-Lyso” fraction (mixture of LEs, amphisomes and lysosomes) and the “Flow” fraction (flow through; other organelles and cytosol). **(A)** Representative immunoblots of various organelle markers. 8  $\mu$ g protein per lane. LIMP2 blot has been shown in Figure 4. **(B)** Relative protein levels in the LE-Lyso fraction of *PSENI* KO. Ctrl level in each experiment is set as 100% (red line). n = 3-4 experiments. **(C-D)** Active CTSD was labeled with Bodipy-pepstatin A in live neurons. **(C)**, representative images of perinuclear areas. **(D)**, quantification of average signal intensities. n = 43 Ctrl, 52 *PSENI* KO neurons. **(E)** Acidic organelles were labeled with LysoTracker (LT)-Red. Average signal intensities in the perinuclear area were quantified. n = 22 Ctrl, 20 *PSENI* KO neurons. **(F)** Lysosomal pH measurement in Ctrl, ML-SA1-treated Ctrl and *PSENI* KO neurons. Bars = mean + SEM (n = 27, 31 and 30 wells, respectively, for Ctrl, ML-SA1-treated Ctrl and *PSENI* KO). \*p < 0.05, \*\* p < 0.01, Kruskal Wallis test with Dunn’s multiple comparisons against Ctrl. **(G)** LC3-RFP-GFP was expressed in Ctrl and *PSENI* KO neurons. Percentages of acidic LC3 vesicles (red only) in proximal-mid axons were quantified. n = 12 Ctrl, 11 *PSENI* KO axons. **(H)** Cytosolic calcium was labeled with Oregon green 488-Bapta AM in live neurons grown in microfluidics devices. Average signal intensities were quantified within microgrooves. n = 51 Ctrl, 50 *PSENI* KO axons. **(B, D, E, G, H)** Bars = mean + SEM. \*p < 0.05, \*\* p < 0.01, Student’s t-test against Ctrl. A.U., arbitrary unit. **(I)** Representative immunoblots of select gamma secretase components in PNS of Ctrl and *PSENI* KO neurons. NCT, nicastrin. No significant changes were detected.

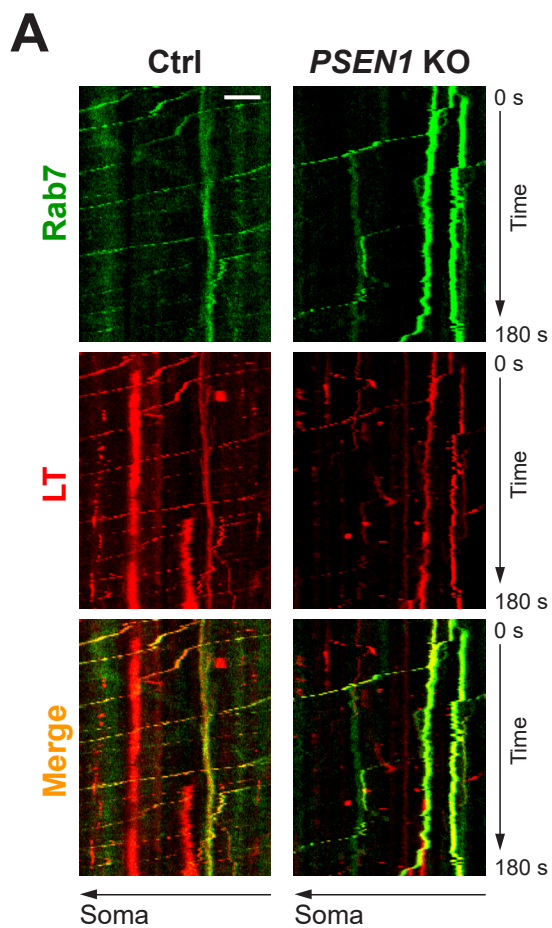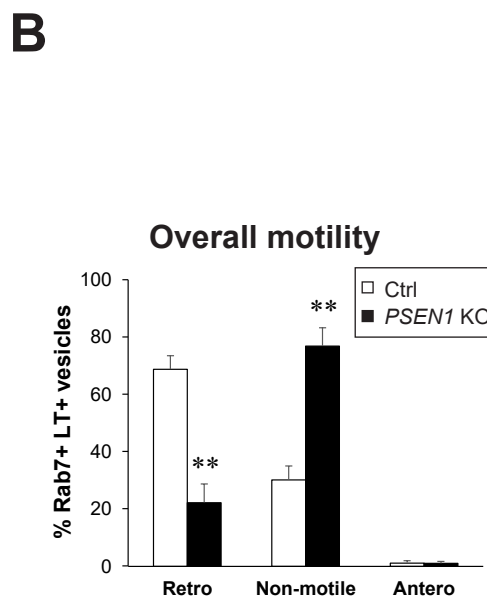

**Fig. S2. Retrograde transport of axonal Rab7+ LT+ vesicles is impaired in *PSENI* KO neurons (related to Fig. 1).**

Time-lapse imaging in axonal segments of Ctrl and *PSENI* KO neurons expressing Rab7-GFP and co-labeled with LysoTracker (LT)-Red. **(A)** Representative kymographs. Scale bar = 5  $\mu$ m. **(B)** Quantitative analyses of (A). Overall motility is represented by % retrograde (retro), non-motile ( $<0.1 \mu$ m/s) and anterograde (antero) vesicles in Rab7+ LT+ vesicle subpopulation. Bars = mean + SEM (n = 10 Ctrl neurons and 10 *PSENI* KO neurons). \*\* p < 0.01, Student's t-test.

Figure S3

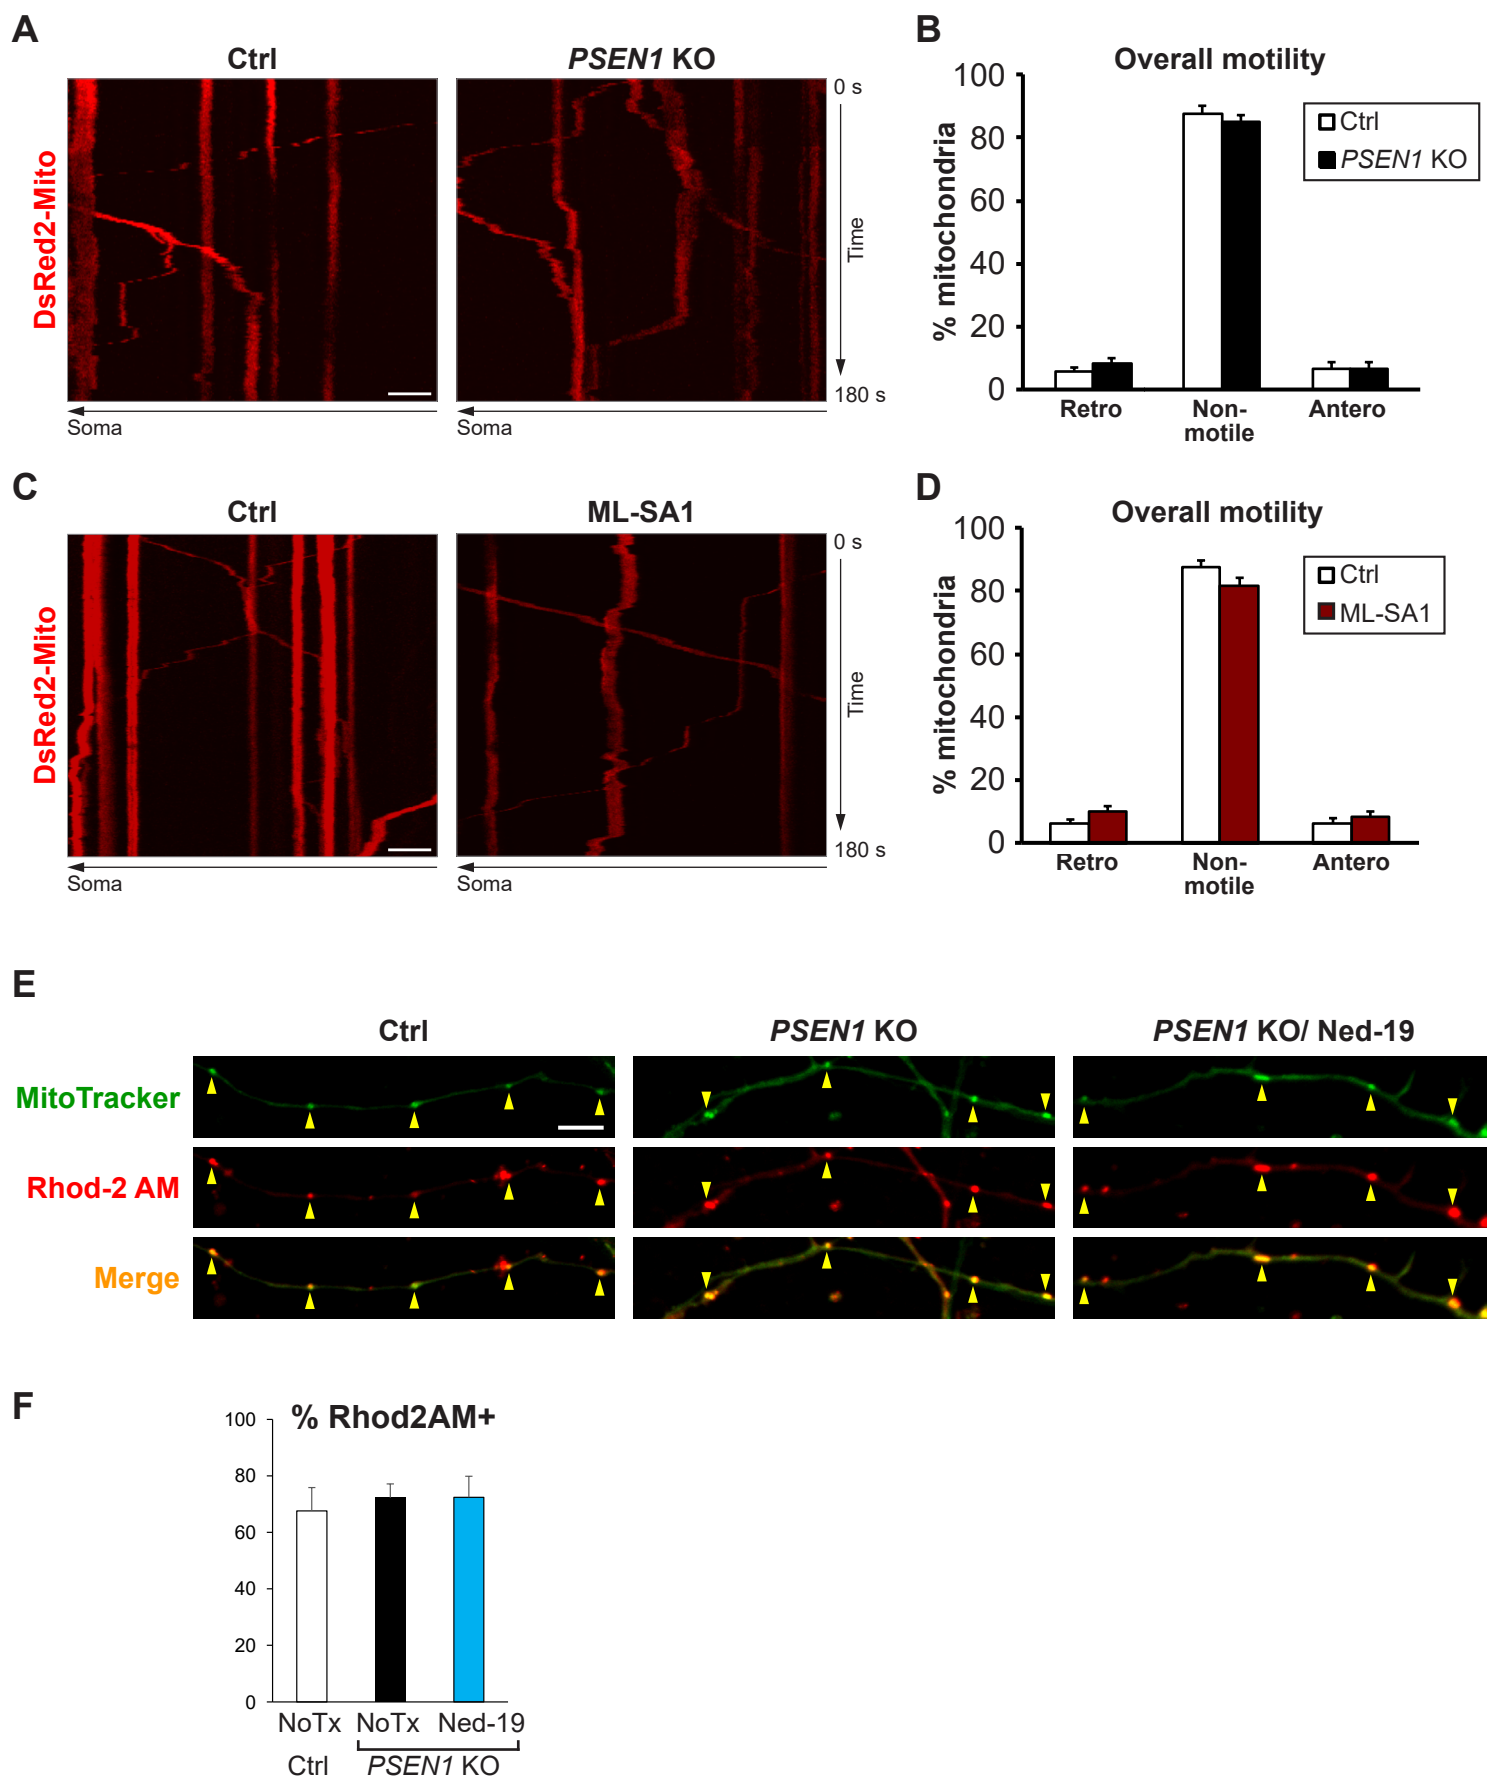

**Fig. S3. Axonal transport of mitochondria is not impaired in *PSENI* KO or ML-SA1-treated Ctrl neurons and mitochondrial  $\text{Ca}^{2+}$  level is not affected by *PSENI* KO and Ned-19 treatment (related to Fig. 1).**

**(A-D)** Time-lapse imaging in axonal segments in Ctrl, *PSENI* KO and ML-SA1-treated Ctrl neurons expressing DsRed2-Mito. **(A, C)** Representative kymographs. Scale bar = 5  $\mu\text{m}$ . **(B, D)** Overall motility represented by the % retrograde (retro), non-motile ( $<0.1 \mu\text{m/s}$ ) and anterograde (antero) mitochondria. Bars = mean + SEM. N = 22 Ctrl, 22 *PSENI* KO neurons in (B); n = 25 Ctrl, 24 ML-SA1-treated Ctrl neurons in (D). **(E-F)** Quantitative analysis of mitochondrial  $\text{Ca}^{2+}$  level. Mitochondria were labeled with MitoTracker-green and mitochondrial  $\text{Ca}^{2+}$  was co-labeled with Rhod-2 AM. To prevent Rhod-2 AM accumulation in endosomes and lysosomes, labeling and imaging were performed at room temperature. Only MitoTracker+ vesicles were analyzed. **(E)** Representative images. Scale bar = 5  $\mu\text{m}$ . **(F)** Graph showing the percentage of MitoTracker vesicles with detectable Rhod-2 AM signal. NoTx, untreated.

**A**

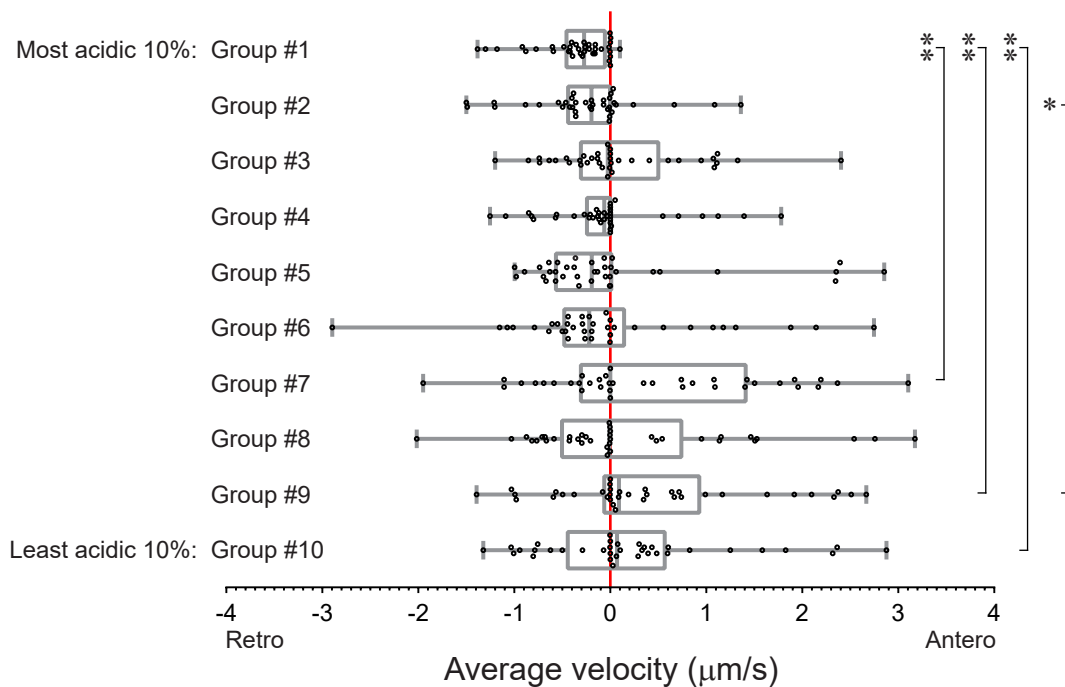

**B**

Analysis of the most acidic 10% of vesicles

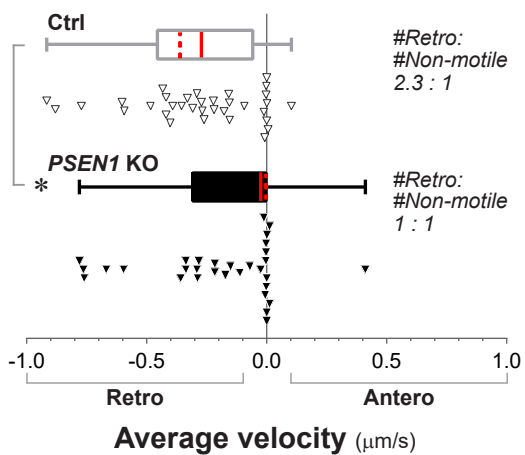



**Fig. S4. Analysis of vesicle motility vs. acidification (related to Fig. 1).**

Time-lapse imaging in axonal segments of LAMP1-mCherry-expressing Ctrl neurons loaded with equal amounts of dextrans conjugated with Alexa Fluor-647 (AF647) and Oregon green-488 (OG488) (see Figure 1E, F). **(A)** LAMP1+ AF647+ OG488+/- vesicles were sorted into 10 groups based on their acidification (reflected by OG488:AF647 ratio; low ratio indicates low pH). Box-and-whisker plots show the average velocity of vesicles in each group with individual datapoints represented by dots (whiskers = minimum and maximum datapoints). Group #1 (i.e. the most acidic 10% of vesicles) was determined to be exclusively retrograde (retro), with significant difference from the Groups #7, #8 and #10 that show substantial anterograde motility (antero) vesicles. \* $p < 0.05$ , \*\* $P < 0.01$ , Kruskal-Wallis test followed by Dunn's multiple comparisons ( $n = 36-37$  vesicles per group). The most acidic 10% of vesicles were thus defined as the population of interest (i.e. acidic LEs/amphisomes with exclusive retrograde motility) in our analyses of Ctrl vs *PSENI* KO (Figure 1E, F). **(B)** Same graph as in the bottom graph of Figure 1F supplemented with individual data points.

Figure S5

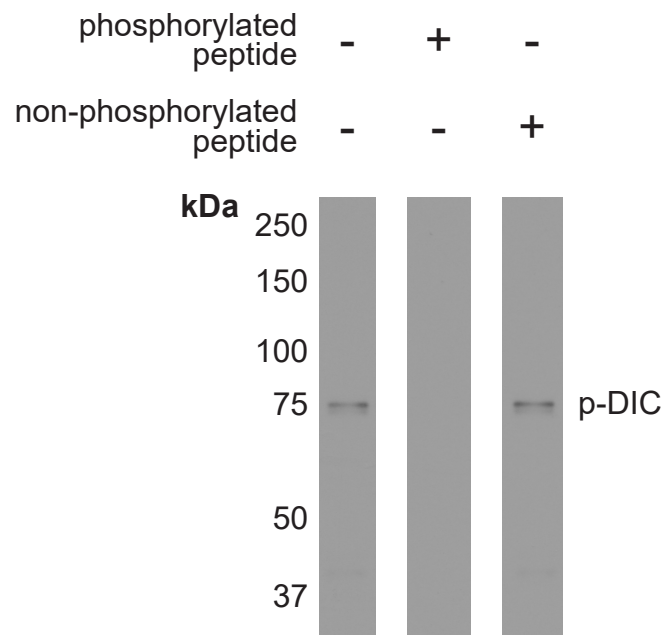

**Fig. S5. Peptide competition assay to confirm specificity of p-DIC antibody (related to Fig. 4, 5, 6, 8).**

A peptide competition assay was performed to verify that this antibody specifically recognizes p-DIC S80, but not the non-phosphorylated epitope. Equal amounts of neuronal lysate were immunoblotted with the p-DIC antibody only (left lane), or in the presence of 400-fold molar excess of peptides containing either phosphorylated (middle lane) or non-phosphorylated DIC S80 (right lane). These blots were processed and exposed simultaneously. The p-DIC-S80-containing peptide completely abolished the signal, but the non-phosphorylated peptide had no effect, thus clearly illustrating the specificity of this antibody against the phosphorylated epitope.

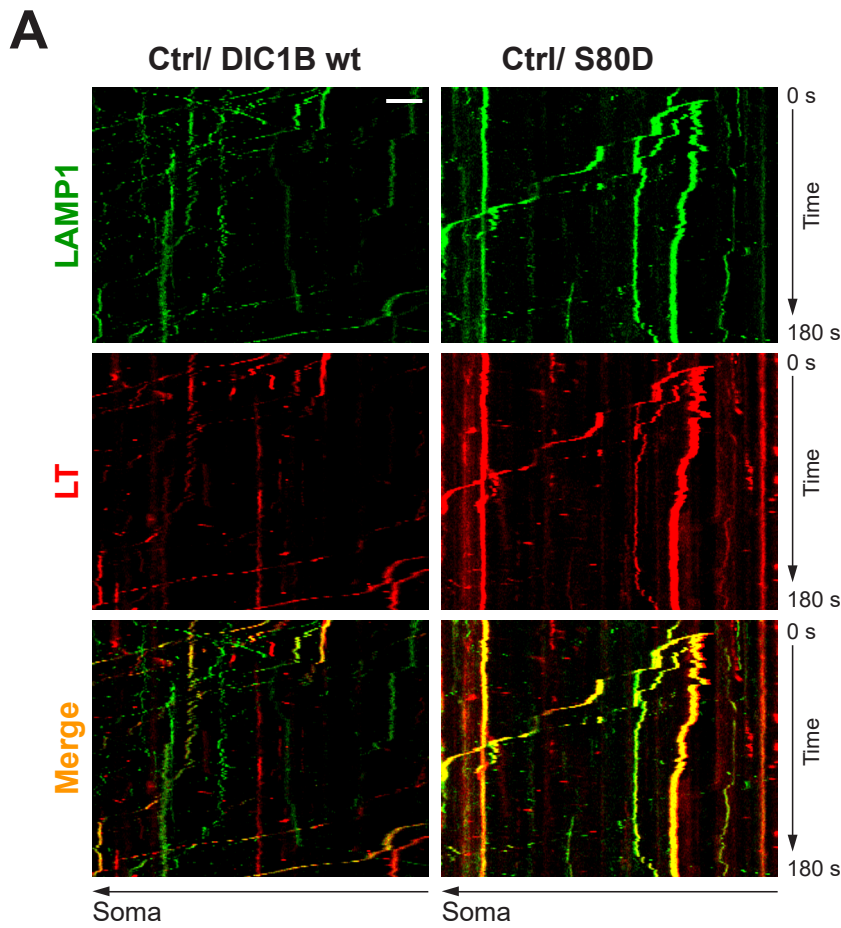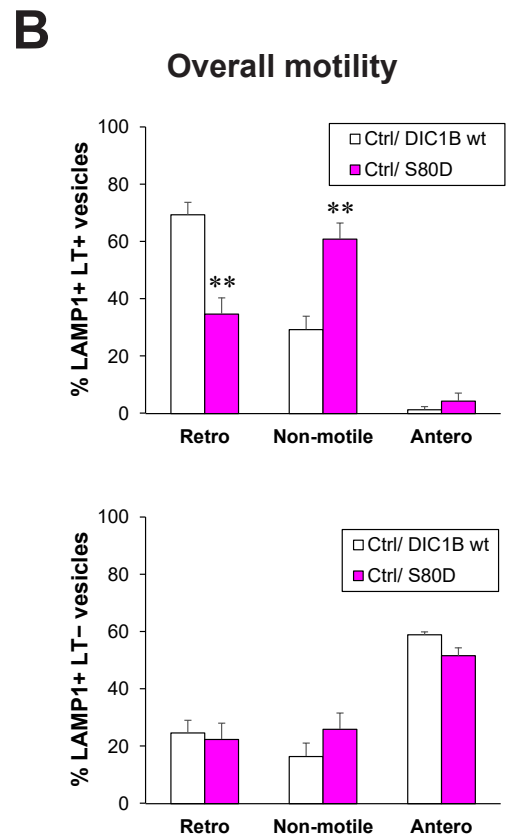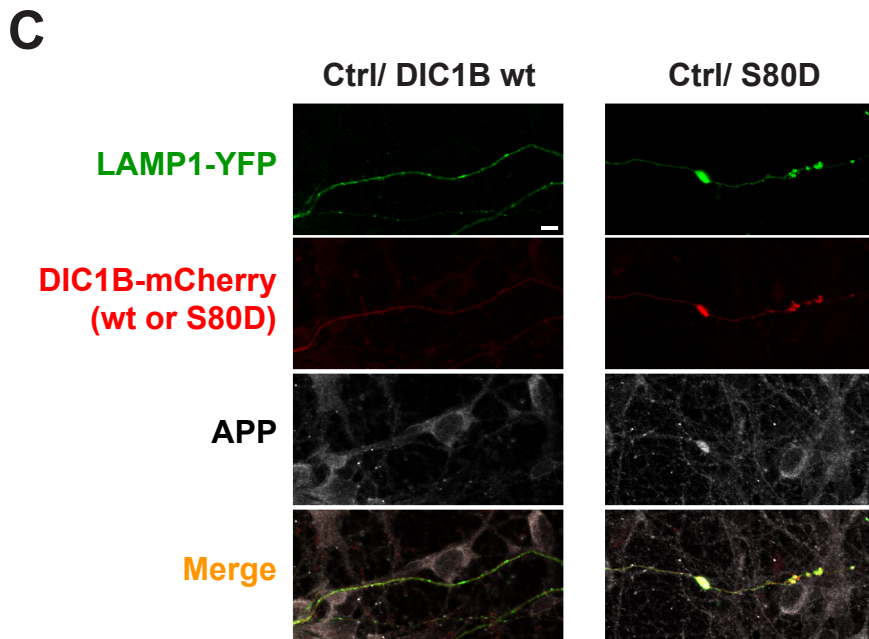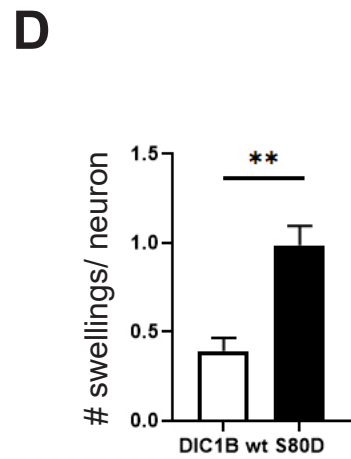

**Fig. S6. Retrograde transport of axonal LAMP<sup>+</sup> LT<sup>+</sup> vesicles is impaired by DIC1B-S80D overexpression, causing neuritic dystrophy (related to Fig. 5).**

**(A-B)** Time-lapse imaging in axonal segments of Ctrl neurons expressing LAMP1-YFP and co-labeled with LysoTracker (LT)-Red, co-expressing either flag-tagged wild-type DIC1B or flag-tagged DIC1B-S80D. **(A)** Representative kymographs. Scale bar = 5  $\mu\text{m}$ . **(B)** Quantitative analyses of **(A)**. Overall motility is represented by % retrograde (retro), non-motile ( $<0.1 \mu\text{m/s}$ ) and anterograde (antero) vesicles in each LAMP1 vesicle subpopulation. Bars = mean + SEM (n = 10 neurons in each group). \*\* p < 0.01, Student's *t*-test. **(C-D)** Quantitative analysis of dystrophic neurites in Ctrl neurons expressing either mCherry-tagged wild-type DIC1B (red) or mCherry-tagged DIC1B-S80D (red), and co-expressing LAMP1-YFP (green). Dystrophic swellings were identified by an apparent thickness of a least 1.3  $\mu\text{m}$  and positivity in both LAMP1-YFP and APP (immunostained, shown in gray scale). **(C)** Scale bar = 5  $\mu\text{m}$ . **(D)** Graph showing the number of swellings identified per neuron, Bar = mean + SEM (n = 79 neurons in DICwt group and 77 neurons in S80D group). \*\*p < 0.01, Student's *t* test.

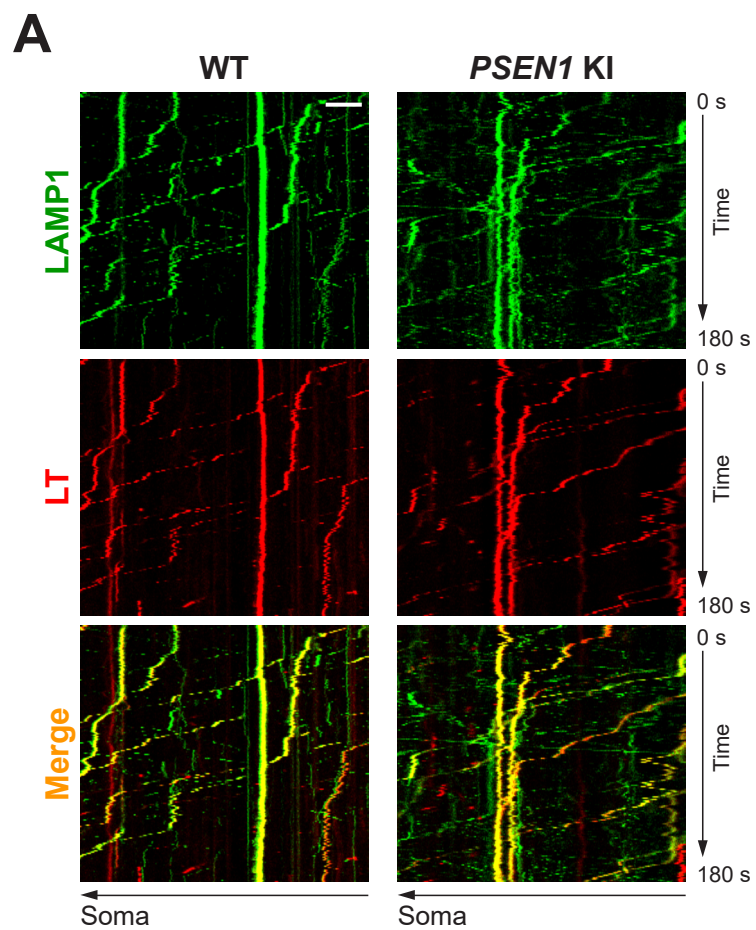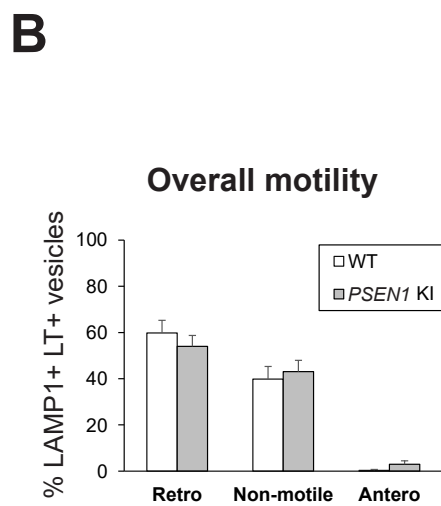

**Fig. S7. Retrograde transport of axonal LAMP+ LT+ vesicles is not affected in embryonic *PSENI* KI neurons (related to Fig. 8).**

Time-lapse imaging in axonal segments of WT and *PSENI* KI neurons expressing LAMP1-YFP and co-labeled with LysoTracker (LT)-Red. (A) Representative kymographs. Scale bar = 5  $\mu$ m.

(B) Quantitative analyses of (A). Overall motility is represented by % retrograde (retro), non-motile ( $<0.1 \mu$ m/s) and anterograde (antero) vesicles in LAMP1+ LT+ vesicle subpopulation.

Bars = mean + SEM (n = 10 neurons in each group).

**Table S1. Antibodies used in this study.**

| <b>Antibodies against dynein- &amp; kinesin-related proteins</b> | <b>Source (Catalog no.)</b>                   |
|------------------------------------------------------------------|-----------------------------------------------|
| DHC (Dynein heavy chain)                                         | Santa Cruz (sc-9115)                          |
| DIC1/2 (Dynein intermediate chain 1/2)                           | Millipore (MAB1618)                           |
| DIC1 (Dynein intermediate chain 1)                               | GeneTex (GTX112418)                           |
| p-DIC (phospho-dynein intermediate chain)                        | Biomatik (custom made)                        |
| LIC1 (Dynein light intermediate chain 1)                         | GeneTex (GTX120114)                           |
| DYNLL1 (Dynein light chain LC8-type 1)                           | BD Biosciences (610726)                       |
| DYNLT1 (Dynein light chain Tctex-type 1)                         | Proteintech (11954-1-AP)                      |
| DYNLRB2 (Dynein light chain Roadblock-type 2)                    | Abcam (ab107721)                              |
| p150 (Dynactin subunit 1)                                        | Abcam (ab11806)                               |
| p50 (Dynactin subunit 2)                                         | Millipore (AB5869)                            |
| Arp1 (Actin-related protein 1)                                   | Millipore (AB6058)                            |
| Snapin (SNAP-associated protein)                                 | Proteintech (10055-1-AP)                      |
| LIS1 (Lissencephaly 1)                                           | Abcam (ab2607)                                |
| Nudel (NudE-like)                                                | Abcam (ab25959)                               |
| KIF3A (Kinesin family member 3A)                                 | Covance (MMS-198P)                            |
| KIF5A (Kinesin family member 5A)                                 | Santa Cruz (sc-13353)                         |
| KIF5C (Kinesin family member 5C)                                 | GeneTex (GTX45387)                            |
| KLC1 (Kinesin light chain 1)                                     | Santa Cruz (sc-13362)                         |
| <b>Antibodies against MAPKs</b>                                  | <b>Source (Catalog no.)</b>                   |
| JNK (c-Jun N-terminal kinase)                                    | Cell Signaling (9252)                         |
| p-JNK (phospho-JNK Thr183/Tyr185)                                | Cell Signaling (9255)                         |
| ERK (extracellular signal-regulated kinase 1/2)                  | Cell Signaling (9107)                         |
| p-ERK (phospho-ERK 1/2 Thr202/Tyr204)                            | Cell Signaling (9101)                         |
| <b>Antibodies against organelle markers/ loading controls</b>    | <b>Source (Catalog no.)</b>                   |
| LIMP2 (Lysosomal integral membrane protein type-2)               | Novus Biologicals (NB400-129)                 |
| LAMP1 (Lysosomal associated membrane protein 1)                  | Developmental Studies Hybridoma Bank (1D4B)   |
| LAMP2 (Lysosomal associated membrane protein 2)                  | Developmental Studies Hybridoma Bank (ABL-93) |
| Rab7 (Ras-related protein Rab7)                                  | Abcam (ab50533)                               |
| CatD (Cathepsin D)                                               | Generated in house                            |
| MPR (cation-independent mannose-6-phosphate receptor)            | Sigma (HPA011332)                             |
| LC3 (Microtubule-associated protein 1 light chain 3)             | Novus Biologicals (NB100-2220)                |
| EEA1 (Early endosome antigen 1)                                  | Santa Cruz (sc-33585)                         |
| Calnexin                                                         | Enzo (ADI-SPA-860)                            |
| TOM20 (Translocase of outer membrane 20)                         | Santa Cruz (sc-11415)                         |
| GAPDH (Glyceraldehyde 3-phosphate dehydrogenase)                 | Santa Cruz (sc-25778)                         |
| $\beta$ -actin                                                   | Novus Biologicals (NB110-67828)               |
| APP                                                              | gift from Dr. Paul Mathews (C1/6.1)           |
| <b>Secondary antibodies for immunocytochemistry</b>              | <b>Source (Catalog no.)</b>                   |
| Alexa Fluor 488 AffiniPure goat anti-rat IgG                     | Jackson ImmunoResearch (112-545-167)          |
| Alexa Fluor 568 goat anti-rabbit IgG, highly cross adsorbed      | Thermo Fisher (A11036)                        |
| Alexa Fluor 633 AffiniPure goat anti-mouse IgG2b                 | Jackson ImmunoResearch (115-605-207)          |



**Data S1. (separate file)**

Excel file containing source data for all figures, tables, and supplementary figures.
